# Supplementary material
Source: PubMed Central journal article supplement (PMC5012488)
Supplement: CJN.11741115SupplementaryData.pdf [file CJN.11741115SupplementaryData.pdf]

Supplemental Table 1

Bias, precision, and accuracy of estimating equations stratified for mGFR based CKD stages ( $\geq 60$ , 30-59, 15-29,  $< 15$  ml/min/1.73m<sup>2</sup>)

| GFR estimating equations<br>(ml/min/1.73m <sup>2</sup> ) | $\geq 60$<br>(N=460)     | 30-59<br>(N=556)         | 15-29<br>(N=106)        | $< 15$<br>(N=17)       |
|----------------------------------------------------------|--------------------------|--------------------------|-------------------------|------------------------|
| <b>eGFR MDRD</b>                                         |                          |                          |                         |                        |
| <b>Percentage Bias<br/>(95% CI)</b>                      | -12.5%<br>(-14.4, -10.6) | -1.1%<br>(-3.4, 1.3)     | 22.2%<br>(14.8, 29.5)   | 90.4%<br>(50.5, 130.4) |
| <b>Precision (SD) (ml/min/1.73m<sup>2</sup>)</b>         | 16.2                     | 11.9                     | 9.27                    | 9.3                    |
| <b>Accuracy 10%</b>                                      | 27.6                     | 35.8                     | 22.6                    | 5.9                    |
| <b>Accuracy 30%</b>                                      | 82.0                     | 84.9                     | 58.5                    | 29.4                   |
| <b>eGFR Cr</b>                                           |                          |                          |                         |                        |
| <b>Percentage Bias<br/>(95% CI)</b>                      | -6.9%<br>(-8.7, -5.1)    | 4.4%<br>(2.2, 6.7)       | 25.8%<br>(18.0, 33.7)   | 91.3%<br>(49.0, 133.6) |
| <b>Precision (SD) (ml/min/1.73m<sup>2</sup>)</b>         | 15.0                     | 11.9                     | 9.80                    | 9.8                    |
| <b>Accuracy 10%</b>                                      | 37.4                     | 36.2                     | 23.6                    | 17.6                   |
| <b>Accuracy 30%</b>                                      | 82.0                     | 84.9                     | 58.5                    | 29.4                   |
| <b>eGFR Cys</b>                                          |                          |                          |                         |                        |
| <b>Percentage Bias<br/>(95% CI)</b>                      | -17.6%<br>(-19.1, -16.1) | -14.0%<br>(-15.6, -12.4) | -6.96%<br>(-12.4, -1.6) | 57.0%<br>(21.1, 92.8)  |
| <b>Precision (SD) (ml/min/1.73m<sup>2</sup>)</b>         | 13.3                     | 9.02                     | 6.90                    | 7.1                    |
| <b>Accuracy 10%</b>                                      | 26.7                     | 28.8                     | 28.3                    | 23.5                   |
| <b>Accuracy 30%</b>                                      | 76.7                     | 77.7                     | 80.2                    | 47.1                   |
| <b>eGFR Cr-Cys</b>                                       |                          |                          |                         |                        |
| <b>Percentage Bias<br/>(95% CI)</b>                      | -13.5%<br>(-14.9, -12.2) | -7.9%<br>(-9.5, -6.4)    | 3.3%<br>(-2.3, 9.0)     | 63.0%<br>(32.2, 93.8)  |
| <b>Precision (SD) (ml/min/1.73m<sup>2</sup>)</b>         | 11.8                     | 8.4                      | 7.3                     | 6.3                    |
| <b>Accuracy 10%</b>                                      | 32.0                     | 34.5                     | 32.1                    | 29.4                   |
| <b>Accuracy 30%</b>                                      | 87.4                     | 88.5                     | 79.2                    | 41.2                   |
